# Supplementary material for: A hydroxyl functionalized ionic liquid-based ultrasound-assisted surfactant-enhanced emulsification microextraction for the determination of herbicides in water samples
Source: Royal Society of Chemistry journal article supplement (doi:10.1039/c4ay01198h), 2014-01-01

Fig. S1. Selection concentration of surfactant. Concentration of the standard mixed solution: 20  $\mu\text{gL}^{-1}$ ; sample volume: 5 mL; extractant volume: 100 $\mu\text{L}$ ; surfactant : Tween 80; extraction time: 3min; room temperature; error bars represent the standard deviation of the mean enrichment factors for n = 3 replications.

Fig.S2. Selection ultrasound extraction time. Concentration of the standard mixed solution: 20  $\mu\text{gL}^{-1}$ ; sample volume: 5 mL; extractant volume: 100 $\mu\text{L}$ ; surfactant : Tween 80, 0.04  $\text{mmolL}^{-1}$ ; temperature, 30 $^{\circ}\text{C}$ ; error bars represent the standard deviation of the mean enrichment factors for n = 3 replications.

Fig. S3. Effect of salting out . Concentration of the standard mixed solution: 20  $\mu\text{gL}^{-1}$ ; sample volume: 5 mL; extractant volume: 100 $\mu\text{L}$ ; surfactant : Tween 80 0.04 $\text{mmolL}^{-1}$ ; extraction time: 2min; temperature30 $^{\circ}\text{C}$ ; error bars represent the standard deviation of the mean enrichment factors for n = 3 replications.

Fig.S4. Effect of dispersive solvent methanol on the extraction efficiency. Concentration of the standard mixed solution: 20  $\mu\text{gL}^{-1}$ ; sample volume: 5 mL; extractant volume: 100 $\mu\text{L}$ ; extraction time: 2min; temperature30 $^{\circ}\text{C}$ ; error bars represent the standard deviation of the mean enrichment factors for n = 3 replications.

Fig S1

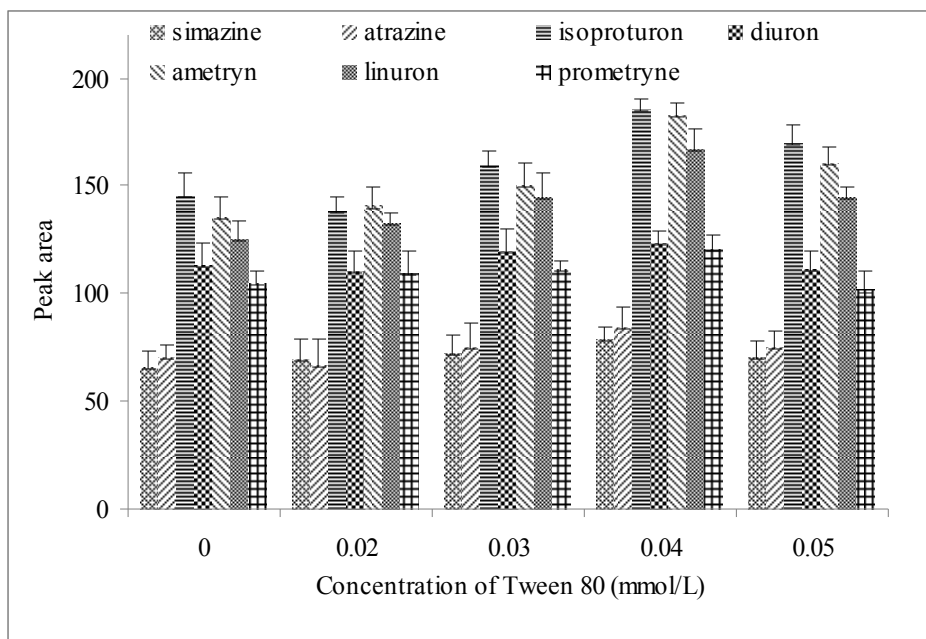

FigS2

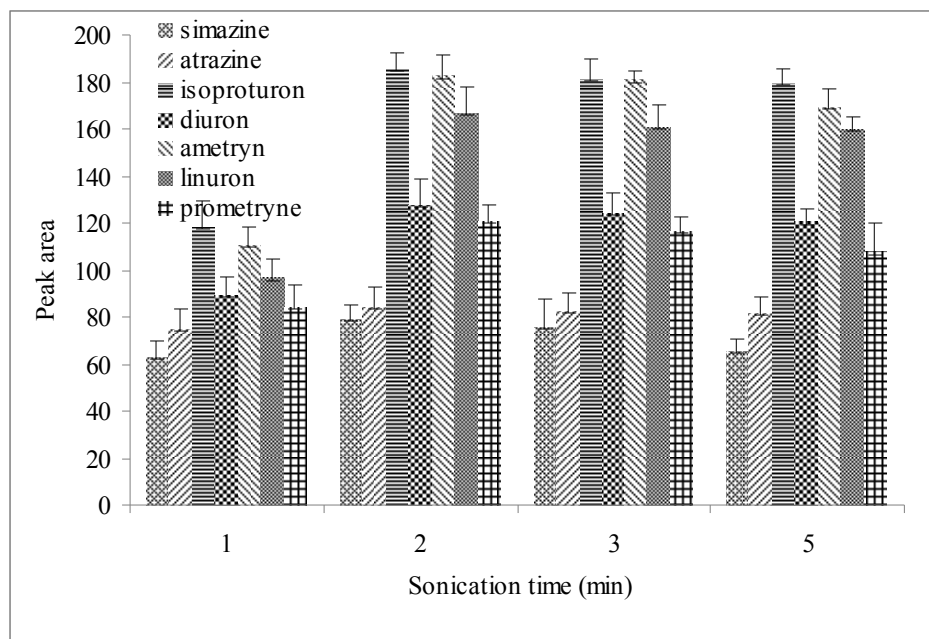

Fig S3

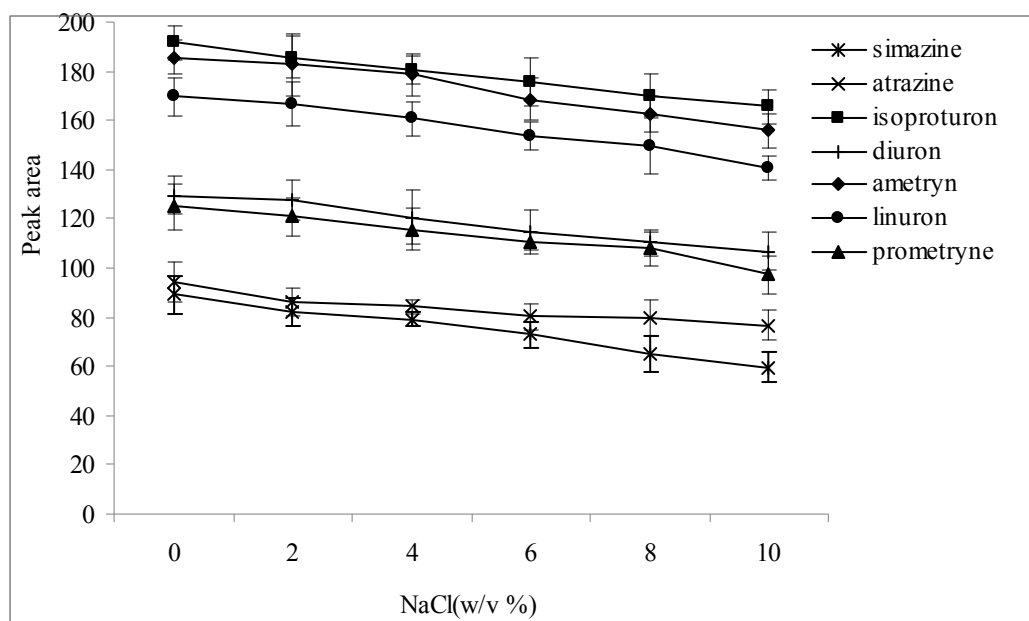

Fig S4

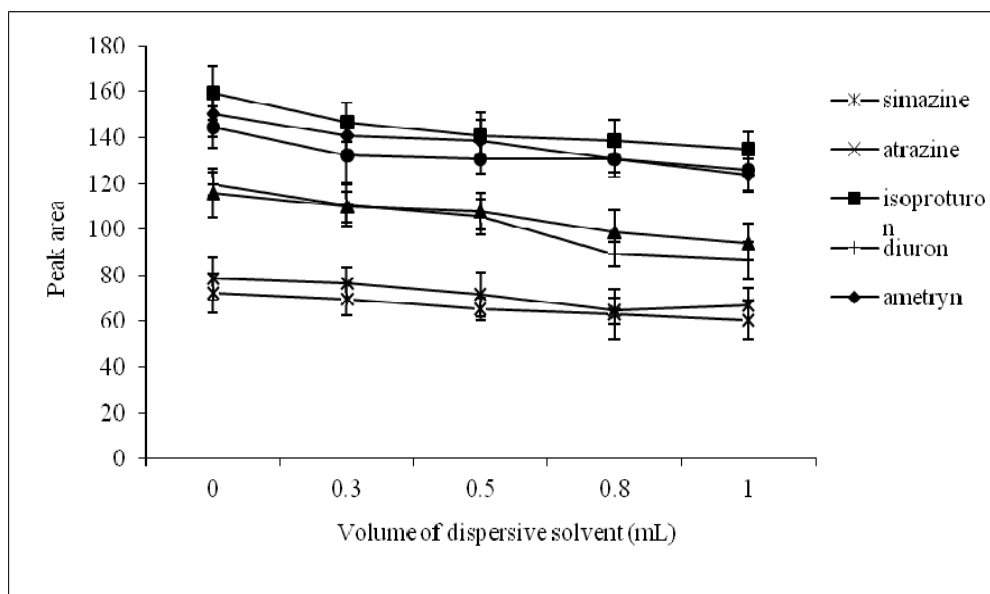

Supplement: c4ay01198h1.pdf [file c4ay01198h1.pdf]
